# Supplementary material for: Cardiovascular risk factors among Roma and non-Roma populations in underprivileged settlements
Source: PubMed Central journal article supplement (PMC11312200; doi:10.1186/s12875-024-02555-6), 2024-08-08
Supplement: 12875_2024_2555_MOESM1_ESM.pdf [file 12875_2024_2555_MOESM1_ESM.pdf]

# TAKING THE SCREENING TESTS CLOSE TO THE PEOPLE

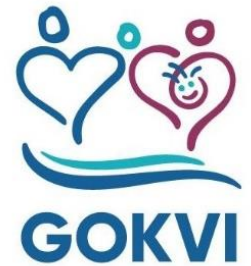

LOCATION, DATE: .....

1. Patient ID: .....
2. Birth date (year. month. day.): .....
3. Sex: .....
4. Zip code: .....

**5. What ethnicity do you feel to belong to?**

- |               |                |                 |
|---------------|----------------|-----------------|
| 1 – Hungarian |                | 14 – Ukrainian  |
| 2 – Bulgarian | 8 – Armenian   | 15 – Arabic     |
| 3 – Roma      | 9 – Romanian   | 16 – Chinese    |
| 4 – Greek     | 10 – Ruthenian | 17 – Russian    |
| 5 – Croatian  | 11 – Serbian   | 18 – Vietnamese |
| 6 – Polish    | 12 – Slovak    | 19 – Other:     |
| 7 – German    | 13 – Slovenian |                 |

**6. Do you identify as any other ethnicity?**

- |                                            |                |                 |
|--------------------------------------------|----------------|-----------------|
| 0 – Does not belong to any other ethnicity | 7 – German     | 14 – Ukrainian  |
| 1 – Hungarian                              | 8 – Armenian   | 15 – Arabic     |
| 2 – Bulgarian                              | 9 – Romanian   | 16 – Chinese    |
| 3 – Roma                                   | 10 – Ruthenian | 17 – Russian    |
| 4 – Greek                                  | 11 – Serbian   | 18 – Vietnamese |
| 5 – Croatian                               | 12 – Slovak    | 19 – Other:     |
| 6 – Polish                                 | 13 – Slovenian |                 |

**7. What is your highest level of education?**

- 1- 8 grades or less
- 2- secondary education
- 3- tertiary education (university, collage)

**8. What is your marital status?**

- 1- single
- 2- married/ partnered
- 3- divorced
- 4- widow

**9. Do you currently smoke?**

- 1- yes, daily
- 2- yes, occasionally
- 3- I have never smoked
- 4- no, I stopped less than a year ago
- 5- no, I stopped more than a year ago

**10. How many cigarettes do you smoke on average per day?**

- 1- 0
- 2- from 1 to 9 cigarettes
- 3- from 10 to 19 cigarettes
- 4- over 20 cigarettes

**11. What is the extent of physical activity during your work? Mark only one answer!**

- 1- I do not work (e.g. retired, unemployed, stay-at-home mom, etc.)
- 2- I sit most of my work time (e.g. office worker)
- 3- I stand or walk most of my work time. However, my work does not require a lot of physical effort (e.g. shop assistant, hairdresser, security guard, childcare, etc.)
- 4- My job requires a lot of physical effort, including lifting heavy objects and using tools (e.g. plumber, electrician, carpenter, cleaner, nurse, gardener, postman, etc.)
- 5- My job requires a lot of physical effort, including lifting very heavy objects (e.g. construction worker, dustman, etc.)

**12. How much time did you spend in the past week doing the following activities: swimming, jogging, aerobics, football, tennis, gym training, etc.?**

- 1- none
- 2- less than 1 hour
- 3- 1-3 hours
- 4- more than 3 hours

**13. How much time did you spend in the past week doing the following activities: cycling, including to and from work and for leisure?**

- 1- none
- 2- less than 1 hour
- 3- 1-3 hours
- 4- more than 3 hours

**14. How much time did you spend in the past week doing the following activities: walking, including to and from work, for shopping and for leisure?**

- 1- none
- 2- less than 1 hour
- 3- 1-3 hours
- 4- more than 3 hours

**15. In the past week, how much time did you spend on: housework/childcare?**

- 1- none
- 2- less than 1 hour
- 3- 1-3 hours
- 4- more than 3 hours

**16. In the past week, how much time did you spend on: gardening or „do it yourself“ activities?**

- 1- none
- 2- less than 1 hour
- 3- 1-3 hours
- 4- more than 3 hours

**17. How much time did you spend sitting last week (including during work, leisure activities, transport)?**

- 1- less than 3 hours
- 2- 3-5 hours
- 3- 5-8 hours
- 4- more than 8 hours

**18. How often do you eat fruits and vegetables?**

- 1- every day
- 2- not every day

**19. How often do you eat sweets (e.g. chocolate, biscuits, cakes, ice cream, etc.)?**

- 1- never
- 2- up to 3 times a week
- 3- 4 or more times a week
- 4- occasionally

**20. How often do you eat salty snacks (e.g. peanuts, chips, etc.)?**

- 1- never
- 2- up to 3 times a week
- 3- 4 or more times a week

4 - occasionally

**21. How often do you drink sugary drinks (e.g. Coke, Fanta, Sprite, Iced tea, etc.)?**

- 1 - never
- 2 - up to 3 times a week
- 3 - 4 or more times a week
- 4 - occasionally

**22. How often do you drink energy drinks (e.g. Red Bull, Hell, Burn, etc.)?**

- 1 - never
- 2 - up to 3 times a week
- 3 - 4 or more times a week
- 4 - occasionally

**23. How often do you drink alcohol?**

- 1 - never
- 2 - monthly or less
- 3 - twice or four times a month
- 4 - twice or three times a week
- 5 - four or more times a week

**24. Have you ever felt the need to cut back on the amount of alcohol you used to drink?**

- 1 - yes
- 2 - no
- 3 - I cannot answer
- 4 - I do not want to answer

**25. Looking back over the last 12 months, how do you identify your health status?**

- 1 - very good
- 2 - good
- 3 - average
- 4 - poor
- 5 - very poor
- 6 - I cannot answer
- 7 - I do not want to answer

**Do you have any of the diseases listed below?**

- |                                                                                                                      |         |        |                  |
|----------------------------------------------------------------------------------------------------------------------|---------|--------|------------------|
| <b>26. Do you have hypertension?</b>                                                                                 | 1 – yes | 2 – no | 3 – I don't know |
| <b>27. Do you have any chronic pulmonary diseases?</b>                                                               | 1 – yes | 2 – no | 3 – I don't know |
| <b>28. Do you have any coronary diseases?</b>                                                                        | 1 – yes | 2 – no | 3 – I don't know |
| <b>29. Do you have any cerebrovascular diseases?</b>                                                                 | 1 – yes | 2 – no | 3 – I don't know |
| <b>30. Do you have peripheral artery disease?</b>                                                                    | 1 – yes | 2 – no | 3 – I don't know |
| <b>31. Do you have Type 2 diabetes?</b>                                                                              | 1 – yes | 2 – no | 3 – I don't know |
| <b>32. Do you have Type 1 diabetes?</b>                                                                              | 1 – yes | 2 – no | 3 – I don't know |
| <b>33. Do you have any chronic kidney diseases?</b>                                                                  | 1 – yes | 2 – no | 3 – I don't know |
| <b>34. Do you have any mental disorders (depression, anxiety, etc.)?</b>                                             | 1 – yes | 2 – no | 3 – I don't know |
| <b>35. Had anyone in your family (siblings, parents, grandparents) under the age of 50 a heart attack or stroke?</b> | 1 – yes | 2 – no | 3 – I don't know |
| <b>36. Do you have any other diseases?</b>                                                                           | 1 - yes | 2 – no | 3 – I don't know |

**Other diseases:**

**37. . Are you being treated for a chronic disease?**

- 1- yes
- 2- no

**38. Who is mainly responsible for your treatment?**

- 1- GP
- 2- medical specialist
- 3- both of them

**39. Does your disease make it difficult for you to go about your daily life?**

- 1- yes
- 2- no

**40. Do you have any help with your disease in everyday life?**

- 1- yes, my family members help
- 2- yes, in the form of home care
- 3- yes, neighbours and friends help
- 4- I have no help

**41. Do you have any problems getting to the place of health care?**

- 1- no
- 2- yes, because of financial problems
- 3- yes, because of reduced mobility
- 4- yes, because the medical institution is far away
- 5- yes, because I do not have enough time
- 6- yes, because I cannot make an appointment
- 7- yes, because there is no such care in the area (within 60 km)
- 8- yes, because I have no help

**42. What information was given to you about your disease during your health care?**

- 1- I have been fully informed
- 2- I also received full information and patient education
- 3- I was partially informed, but it would be good to know more about it
- 4- I do not know what my disease is, I have not been informed

**43. Apart from health care specialists, from whom or where did you get information about your disease?**

- 1- family, friends
- 2- newspapers
- 3- television, radio
- 4- internet
- 5- I have not checked
- 6- I have not found any information about it

**44. Do you follow the treatment plan?**

- 1- yes
- 2- partly
- 3- no, because I disagree with the treatment
- 4- no, because I cannot afford the medicines
- 5- no, because there was a side effect
- 6- no, because I don't know how to use it
- 7- no, because I do not trust its effectiveness
- 8- no, because I am afraid of side effects

**Measured results:**

|                                                |            |           |                     |
|------------------------------------------------|------------|-----------|---------------------|
| Body weight                                    |            | kg        |                     |
| Body height                                    |            | cm        |                     |
| Waist circumference                            |            | cm        |                     |
| Blood pressure left arm, systolic              |            | mmHg      |                     |
| Blood pressure left arm, diastolic             |            | mmHg      |                     |
| Ankle-brachial index, right                    |            | mmHg      |                     |
| Ankle-brachial index, left                     |            | mmHg      |                     |
| Total cholesterol                              |            | mmol/l    |                     |
| <i>Are you treated for high cholesterol?</i>   | <i>yes</i> | <i>no</i> | <i>not relevant</i> |
| Blood glucose                                  |            | mmol/l    |                     |
| <i>Was it recorded on an empty stomach?</i>    | <i>yes</i> | <i>no</i> |                     |
| <i>Are you treated for high blood glucose?</i> | <i>yes</i> | <i>no</i> | <i>not relevant</i> |
|                                                |            |           |                     |
